# Supplementary material
Source: Research Square preprint supplement (doi:10.21203/rs.3.rs-9267857/v1)
Supplement: Supplementary file 1 [file 33ddaf165f351027ca0c9323.docx]

**Larval/pupal household survey**

**House code: ________ Group: _____ Health worker: _______________ Date: ___/____/_____**

**Building type:** House: _ Shop/store: _ Health unit: _Church: _ School: _ Restaurant: _ other**:** _____________ Public space:__

| **#** | | ***Large water tanks** | | | | | | **Small water containers** | | | | | | | | | | ***** **Details of each tank** | | | | | **Larva and pupae** | | ***Measures** | | | |
| --- | --- | --- | --- | --- | --- | --- | --- | --- | --- | --- | --- | --- | --- | --- | --- | --- | --- | --- | --- | --- | --- | --- | --- | --- | --- | --- | --- | --- |
|  | | *Ground tank | | | | Storage containers | Elevated tanks | Buckets | Cans / small containers / Jars | Flowerpots | Tires | Sumps / sewers | Bottles (with water) | Gasoline bottles (*Pimpinas*) | Natural breeding site | Other: | Other: | Volume capacity (L) | Filling level (1=Empty, 2=partially filled, 3=Full) | Tank location  (1=Inside, 0=Outside) | Shading  (1=Yes, 2=partial, 3=No) | Covered tank  (1=Yes, 2=partial, 3=No) | Larvae | Pupae | Length (cm) | Width (cm) | Height (cm) |
| Concrete | Plastic | Ceramic | Other | Positive (+),  Negative (-) | Pupae count |
| **Each water tank has its row (Water tank such as bottles etc. can be put together)** | 1 |  |  |  |  |  |  |  |  |  |  |  |  |  |  |  |  |  |  |  |  |  |  |  |  |  |  |
| 2 |  |  |  |  |  |  |  |  |  |  |  |  |  |  |  |  |  |  |  |  |  |  |  |  |  |  |
| 3 |  |  |  |  |  |  |  |  |  |  |  |  |  |  |  |  |  |  |  |  |  |  |  |  |  |  |
| 4 |  |  |  |  |  |  |  |  |  |  |  |  |  |  |  |  |  |  |  |  |  |  |  |  |  |  |
| 5 |  |  |  |  |  |  |  |  |  |  |  |  |  |  |  |  |  |  |  |  |  |  |  |  |  |  |
| 6 |  |  |  |  |  |  |  |  |  |  |  |  |  |  |  |  |  |  |  |  |  |  |  |  |  |  |
| 7 |  |  |  |  |  |  |  |  |  |  |  |  |  |  |  |  |  |  |  |  |  |  |  |  |  |  |
| 8 |  |  |  |  |  |  |  |  |  |  |  |  |  |  |  |  |  |  |  |  |  |  |  |  |  |  |
| 9 |  |  |  |  |  |  |  |  |  |  |  |  |  |  |  |  |  |  |  |  |  |  |  |  |  |  |
| 10 |  |  |  |  |  |  |  |  |  |  |  |  |  |  |  |  |  |  |  |  |  |  |  |  |  |  |
| 11 |  |  |  |  |  |  |  |  |  |  |  |  |  |  |  |  |  |  |  |  |  |  |  |  |  |  |
| 12 |  |  |  |  |  |  |  |  |  |  |  |  |  |  |  |  |  |  |  |  |  |  |  |  |  |  |
| 13 |  |  |  |  |  |  |  |  |  |  |  |  |  |  |  |  |  |  |  |  |  |  |  |  |  |  |
| 15 |  |  |  |  |  |  |  |  |  |  |  |  |  |  |  |  |  |  |  |  |  |  |  |  |  |  |
| 16 |  |  |  |  |  |  |  |  |  |  |  |  |  |  |  |  |  |  |  |  |  |  |  |  |  |  |
| 17 |  |  |  |  |  |  |  |  |  |  |  |  |  |  |  |  |  |  |  |  |  |  |  |  |  |  |
| 18 |  |  |  |  |  |  |  |  |  |  |  |  |  |  |  |  |  |  |  |  |  |  |  |  |  |  |

- This information is exclusively for laundry tank

Comment: ___________________________________________________________________________________________________________________
