# Supplementary material
Source: Research Square preprint supplement (doi:10.21203/rs.3.rs-9267857/v1)
Supplement: Supplementary file 2 [file 866f54a5ab01676a6c4f8955.xlsx]

## Sheet: Practice DiD
Practice	Comparison	DiD_pp	CI95	p_value
small_containers	C1 vs C2+C3	16.6	[9.1, 24.2]	<0.001
covering_tank	C1 vs C2+C3	9	[4.9, 13.1]	<0.001
chlorine	C1 vs C2+C3	-3.1	[-12.4, 6.2]	0.514
total_washing	C1 vs C2+C3	14.8	[5.7, 23.8]	0.001
small_containers	C1 vs C2	18	[10.3, 25.7]	<0.001
covering_tank	C1 vs C2	9.7	[4.7, 14.6]	<0.001
chlorine	C1 vs C2	-2.4	[-13.5, 8.7]	0.668
total_washing	C1 vs C2	11.8	[1.3, 22.3]	0.027
small_containers	C1 vs C3	15.2	[7.5, 22.9]	<0.001
covering_tank	C1 vs C3	8.3	[4.1, 12.6]	<0.001
chlorine	C1 vs C3	-3.8	[-14.6, 7]	0.490
total_washing	C1 vs C3	17.7	[7, 28.3]	0.001

## Sheet: Index DiD
Index	Comparison	DiD	CI95	p_value
HI	C1 vs C2+C3	-17.4	[-25.3, -9.5]	<0.001
CI	C1 vs C2+C3	-5.3	[-8.9, -1.7]	0.004
BI	C1 vs C2+C3	-0.23	[-0.34, -0.12]	<0.001
PPI	C1 vs C2+C3	0.027	[-0.45, 0.504]	0.911
