# Supplementary material
Source: Research Square preprint supplement (doi:10.21203/rs.3.rs-9267857/v1)
Supplement: Supplementary file 5 [file c4936db169051495edb17212.xlsx]

## Sheet: Logistic Regression
Characteristic	Covering large breeding sites OR [95% CI]	Cleaning tanks OR [95% CI]	Management of small breeding sites OR [95% CI]	Chlorine use OR [95% CI]
Study group: Control (reference)
CV+WA	1.56 [1.08-2.27]*	2.23 [1.51-3.31]***	2.08 [1.42-3.06]***	0.82 [0.58-1.16]
CV only	0.80 [0.54-1.18]	1.42 [0.98-2.05]~	1.01 [0.68-1.50]	1.00 [0.71-1.41]
Pre-intervention practice	6.24 [4.56-8.60]***	1.85 [1.36-2.57]***	5.41 [3.88-7.57]***	1.45 [1.08-1.94]*
Sex: Female (reference)
Male	0.96 [0.68-1.34]	0.80 [0.57-1.13]	1.16 [0.83-1.63]	0.72 [0.52-0.99]*
Age <34 (reference)
35-64 years	0.95 [0.68-1.33]	1.18 [0.85-1.65]	0.90 [0.64-1.25]	1.35 [0.99-1.83]~
>64 years	0.89 [0.51-1.53]	1.44 [0.83-2.56]	1.32 [0.77-2.23]	1.08 [0.64-1.80]
Education level: Primary (reference)
Secondary	0.84 [0.59-1.19]	0.87 [0.61-1.23]	1.21 [0.86-1.71]	1.02 [0.74-1.40]
Higher	1.00 [0.54-1.83]	0.66 [0.37-1.21]	0.77 [0.38-1.48]	1.11 [0.63-1.92]
No education	0.96 [0.48-1.88]	1.15 [0.58-2.47]	0.95 [0.47-1.85]	0.45 [0.20-0.92]*
Mobility: Inside area (reference)
Outside area	1.07 [0.72-1.57]	1.14 [0.77-1.71]	0.67 [0.44-1.01]	1.42 [1.00-2.01]~
~ p value=0.05
*p value=<0.05
*** p value=<0.001
